# Supplementary material for: Techno-Economic and Environmental Analysis for Direct Catalytic Conversion of CO2 to Methanol and Liquid/High-Calorie-SNG Fuels
Source: MDPI journal article supplement (doi:10.3390/catal11060687), 2021-05-29
Supplement: s1 [file s1]

# Techno-Economic and Environmental Analysis for Direct Catalytic Conversion of CO<sub>2</sub> to Methanol and Liquid/High-Calorie-SNG Fuels

Tesfalem Aregawi Atsbha <sup>1</sup>, Taeksang Yoon <sup>2</sup>, Byung-Hoon Yoo <sup>2</sup> and Chul-Jin Lee <sup>1,2,\*</sup>

<sup>1</sup> Department of Intelligent Energy and Industry, Chung-Ang University, 84, Heukseok-ro, Dongjak-gu, Seoul 06974, Korea; tesfalem@cau.ac.kr

<sup>2</sup> School of Chemical Engineering and Materials Science, Chung-Ang University, 84, Heukseok-ro, Dongjak-gu, Seoul 06974, Korea; yoonts24@naver.com (T.Y.); astrono6@naver.com (B.-H.Y.)

\* Correspondence: cjlee@cau.ac.kr; Tel.: +82-2-820-5941; Fax: +82-2-824-3495

## 1. Appendix A: Data for economic assessment

### 1.1. Methanol synthesis

**Table S1.** Equipment cost data.

| Purchased equipment         | Cost(\$)          | Reference |
|-----------------------------|-------------------|-----------|
| Compressors                 | 6,931,000         | This work |
| Heat exchangers             | 932,000           | This work |
| Reactor                     | 5,640,000         | This work |
| Decanter                    | 243,000           | This work |
| Flash separators            | 938,300           | This work |
| Distillation column         | 2,427,882         | [1]       |
| Column condenser            | 139,000           | This work |
| <b>Total Equipment cost</b> | <b>17,008,182</b> |           |

Equipment cost of distillation column was determined by the following equation [2], as can be seen in detail in Table S2:

$$\frac{A_1}{A_2} = \left(\frac{B_1}{B_2}\right)^d, \quad (1)$$

where A<sub>1</sub> is the calculated cost of a new capacity B<sub>1</sub>, A<sub>2</sub> is the reference cost of the known capacity B<sub>2</sub>, and d is the equipment specific scale factor.

**Table S2.** Equipment cost data from reference.

| Process unit section | Reference cost (A <sub>2</sub> ) in M\$ | Design variable              | Unit | Reference size (B <sub>2</sub> ) | Scaling factor (d) | New equipment size (B <sub>1</sub> ) | New equipment cost (A <sub>1</sub> ) in M\$ | Reference |
|----------------------|-----------------------------------------|------------------------------|------|----------------------------------|--------------------|--------------------------------------|---------------------------------------------|-----------|
| Distillation column  | 0.623                                   | Methanol production flowrate | kg/h | 9,132                            | 0.6                | 88,278                               | 2.43                                        | [1]       |

**Table S3.** Total capital investment estimation[3].

| Cost elements                                       | Ratio factor for fluid processing plant (of delivered equipment) | Costs (\$)         |
|-----------------------------------------------------|------------------------------------------------------------------|--------------------|
| <b>1. Direct cost</b>                               |                                                                  |                    |
| Delivery                                            | 0.1                                                              | 1,700,818          |
| <b>Subtotal: Purchased equipment (delivered)</b>    | 1                                                                | 18,709,000         |
| Purchased equipment installation                    | 0.47                                                             | 8,793,230          |
| Instrumentation & controls                          | 0.36                                                             | 6,735,240          |
| Piping                                              | 0.68                                                             | 4,579,963          |
| Electrical systems                                  | 0.11                                                             | 2,057,990          |
| Buildings (including services)                      | 0.18                                                             | 3,367,620          |
| Yard improvements                                   | 0.1                                                              | 1,870,900          |
| Service facilities                                  | 0.7                                                              | 13,096,300         |
| <b>Total direct costs</b>                           |                                                                  | 59,210,244         |
| <b>2. Indirect cost</b>                             |                                                                  |                    |
| Engineering and supervision                         | 0.33                                                             | 6,173,970          |
| Construction expenses                               | 0.41                                                             | 7,670,690          |
| Legal expenses                                      | 0.04                                                             | 748,360            |
| Contractor's fee                                    | 0.22                                                             | 4,115,980          |
| Contingency                                         | 0.44                                                             | 8,231,960          |
| <b>Total indirect costs</b>                         | -                                                                | 26,940,960         |
| 3. Working capital (WC)                             | 0.89                                                             | 16,651,010         |
| Fixed capital investment (FCI)                      | Total direct cost + Total indirect cost                          | 86,151,204         |
| <b>Total capital investment (TCI) = (WC) +(FCI)</b> | -                                                                | <b>102,802,214</b> |

**Table S4.** Total Operating cost estimation from the simulation result.

| Cost parameters             | Model cost (\$/yr) |
|-----------------------------|--------------------|
| CO <sub>2</sub>             | 26,617,127         |
| H <sub>2</sub>              | 368,896,364        |
| Catalysts                   | 1,645,873          |
| Operating labor             | 1,550,185          |
| Operating supervision       | 232,528            |
| Cooling water               | 3,046,603          |
| Electricity                 | 386,603            |
| Maintenance and repairs     | 2,660,000          |
| Operating supplies          | 6,030,584          |
| Laboratory charges          | 904,588            |
| Insurance and taxes         | 1,723,024          |
| Plant overhead costs        | 4,687,978          |
| Administrative costs        | 1,171,994          |
| <b>Total Operating cost</b> | <b>416,739,375</b> |

**Table S5.** Total product cost and unit production cost estimation from the simulation result.

| Cost parameters                          | Economic assumptions [4]                                                                            | Cost(\$/yr)        |
|------------------------------------------|-----------------------------------------------------------------------------------------------------|--------------------|
| Raw materials                            | -                                                                                                   | 398,805,236        |
| Utilities                                | -                                                                                                   | 3,046,603          |
| Maintenance and repairs                  | -                                                                                                   | 6,030,584          |
| Operating supplies                       | 15% of maintenance and repairs                                                                      | 904,588            |
| Operating labor                          | -                                                                                                   | 1,550,185          |
| Operating supervision                    | 20% of operating labor                                                                              | 232,528            |
| Laboratory charges                       | 15% of operating labor                                                                              | 232,528            |
| Insurance and taxes                      | 2% of fixed capital investment                                                                      | 1,723,024          |
| Plant overhead costs                     | 60% of Total labor costs consisting of operating labor, operating supervision and maintenance labor | 4,687,978          |
| General expenses                         | 2.5% of revenue                                                                                     | 5,622,422          |
| <b>Total product cost</b>                | -                                                                                                   | <b>422,835,675</b> |
|                                          | Unit production                                                                                     |                    |
| Methanol capacity (kg/yr)                | -                                                                                                   | 573,092,481        |
| <b>Total unit production cost(\$/kg)</b> | -                                                                                                   | <b>0.74</b>        |

Minimum selling price = Breakeven selling price = total unit production cost

Minimum selling price = 0.74\$/kg

### 1.1. Fischer–Tropsch process model (liquid/high-calorie-SNG fuels synthesis)

**Table S6.** Equipment cost data.

| Purchased equipment         | Cost(\$)          | Reference |
|-----------------------------|-------------------|-----------|
| Compressors                 | 9,159,000         | This work |
| Heat exchangers             | 509,600           | This work |
| Reactor                     | 5,640,000         | This work |
| Decanter                    | 243,000           | This work |
| Flash separator             | 420,000           | This work |
| Pressure swing adsorption   | 28,141,443        | [5]       |
| CO <sub>2</sub> absorption  | 136,328           | [6]       |
| <b>Total equipment cost</b> | <b>44,249,372</b> |           |

Equipment cost of H<sub>2</sub> PSA and CO<sub>2</sub> adsorption were determined by the following equation [2], as can be seen in detail in Table S7:

$$\frac{A_1}{A_2} = \left( \frac{B_1}{B_2} \right)^d, \quad (2)$$

where A<sub>1</sub> is the calculated cost of a new capacity B<sub>1</sub>, A<sub>2</sub> is the reference cost of the known capacity B<sub>2</sub>, and d is the equipment specific scale factor.

**Table S7.** Equipment cost data from reference.

| Process unit section      | Reference cost (A <sub>2</sub> ) in M\$ | Design variable                                        | Unit   | Reference size (B <sub>2</sub> ) | Scaling factor (d) | New equipment size (B <sub>1</sub> ) | New equipment cost (A <sub>1</sub> ) in M\$ | Reference |
|---------------------------|-----------------------------------------|--------------------------------------------------------|--------|----------------------------------|--------------------|--------------------------------------|---------------------------------------------|-----------|
| Pressure swing adsorption | 2.05                                    | Feed flowrate (Hierarchy model with 4-adsorber column) | kmol/h | 115.99                           | 0.74               | 3995.2                               | 28.1                                        | [5]       |

|                            |      |                                                         |       |      |     |     |       |     |
|----------------------------|------|---------------------------------------------------------|-------|------|-----|-----|-------|-----|
| CO <sub>2</sub> adsorption | 0.05 | Radfrac model<br>with 4 stages,<br>make-up: 142<br>kg/h | ton/h | 29.5 | 0.6 | 168 | 0.136 | [6] |
|----------------------------|------|---------------------------------------------------------|-------|------|-----|-----|-------|-----|

**Table S8.** Total capital investment estimation [3].

| Cost elements                               |                                         | Cost (\$)   |
|---------------------------------------------|-----------------------------------------|-------------|
| 1. Direct cost                              |                                         |             |
| Delivery                                    | 0.1                                     | 4,424,937   |
| Subtotal: Purchased equipment (delivered)   | 1                                       | 48,674,309  |
| Purchased equipment installation            | 0.47                                    | 22,876,925  |
| Instrumentation & Controls                  | 0.36                                    | 17,522,751  |
| Piping                                      | 0.68                                    | 11,915,470  |
| Electrical systems                          | 0.11                                    | 5,354,174   |
| Buildings (including services)              | 0.18                                    | 8,761,375   |
| Yard improvements                           | 0.1                                     | 4,867,430   |
| Service facilities                          | 0.7                                     | 34,072,016  |
| Total direct costs                          |                                         | 154,044,455 |
| 2. Indirect cost                            |                                         |             |
| Engineering and supervision                 | 0.33                                    | 16,062,522  |
| Construction expenses                       | 0.41                                    | 19,956,466  |
| Legal expenses                              | 0.04                                    | 1,946,972   |
| Contractor's fee                            | 0.22                                    | 10,708,348  |
| Contingency                                 | 0.44                                    | 21,416,696  |
| Total indirect costs                        | -                                       | 70,091,005  |
| 3. Working capital (WC)                     | 0.89                                    | 43,320,135  |
| Fixed capital investment (FCI)              | Total direct cost + Total indirect cost | 224,135,460 |
| Total capital investment (TCI)= (WC) +(FCI) | -                                       | 267,455,596 |

**Table S9.** Total operating cost estimation from the simulation result.

| Cost parameters             | Model cost (\$/yr) |
|-----------------------------|--------------------|
| CO <sub>2</sub>             | 26,617,127         |
| H <sub>2</sub>              | 368,896,363        |
| Catalysts                   | 54,182             |
| Operating labor             | 1,480,237          |
| Operating supervision       | 222,035            |
| Cooling water               | 184,730            |
| Electricity                 | 2,661,750          |
| Maintenance and repairs     | 15,689,482         |
| Operating supplies          | 2,353,422          |
| Laboratory charges          | 684,720            |
| Insurance and taxes         | 4,482,709          |
| Plant overhead costs        | 10,435,053         |
| Administrative costs        | 2,608,763          |
| <b>Total operating cost</b> | <b>436,370,577</b> |

**Table S10.** Total product cost and unit production cost estimation from the simulation result.

| Cost parameters                          | Economic assumptions[4]                                                                             | Cost (\$/yr)       |
|------------------------------------------|-----------------------------------------------------------------------------------------------------|--------------------|
| Raw materials                            | -                                                                                                   | 395,567,673        |
| Utility                                  | -                                                                                                   | 2,846,480          |
| Maintenance and repairs                  | -                                                                                                   | 15,689,482         |
| Operating Supplies                       | 15% of maintenance and repairs                                                                      | 2,353,422          |
| Operating labor                          | -                                                                                                   | 1,480,237          |
| Operating supervision                    | 20% of operating labor                                                                              | 222,035            |
| Laboratory charges                       | 15% of operating labor                                                                              | 684,720            |
| Insurance and taxes                      | 2% of fixed capital investment                                                                      | 4,482,709          |
| Plant overhead costs                     | 60% of Total labor costs consisting of operating labor, operating supervision and maintenance labor | 10,435,053         |
| General Expenses                         | 2.5% of revenue                                                                                     | 5,568,636          |
| <b>Total product cost</b>                | -                                                                                                   | <b>439,276,268</b> |
| <b>Unit production</b>                   |                                                                                                     |                    |
| Liquid fuel capacity(annual)             | -                                                                                                   | 82,307,708         |
| SNG capacity(annual)                     | -                                                                                                   | 175,582,374        |
| Total capacity(annual)                   | -                                                                                                   | 257,890,083        |
| Liquid fuel unit production              | -                                                                                                   | 5.34               |
| SNG unit production                      | -                                                                                                   | 2.50               |
| <b>Total unit production cost(\$/kg)</b> | -                                                                                                   | <b>1.70</b>        |

Minimum selling price = Breakeven selling price = total unit production cost

Minimum selling price = 1.70\$/kg

The following equation was used to compute the payback time

$$\text{Payback time(years)} = \left( \frac{\text{Fixed capital investment} + \text{start up}}{\text{profit after taxes} + \text{Depreciation}} \right) . \quad (3)$$

## 2. Appendix B: Data for environmental assessment

### 2.1. Methanol synthesis

**Table S11.** Environmental assessment data from the simulation results.

|                                                                                               | GWP factor | Unit                                    | Used amount (Unit/h)              | kgCO <sub>2</sub> emitted (kgCO <sub>2-eq</sub> /h) |
|-----------------------------------------------------------------------------------------------|------------|-----------------------------------------|-----------------------------------|-----------------------------------------------------|
| CO <sub>2</sub>                                                                               | 0.875      | kgCO <sub>2-eq</sub> /kgCO <sub>2</sub> | 95,061 kgCO <sub>2</sub>          | 83,137                                              |
| H <sub>2</sub>                                                                                | 0.97       | kgCO <sub>2-eq</sub> /kgH <sub>2</sub>  | 13,063 kgH <sub>2</sub>           | 12,671                                              |
| Electricity                                                                                   | 0.492      | kgCO <sub>2-eq</sub> /kwh               | 18,724 kwh                        | 9,211                                               |
| CO <sub>2</sub> (purged)                                                                      | -          | -                                       | 4,151                             | 4,151                                               |
| Total CO <sub>2</sub> emission                                                                |            |                                         |                                   | 109,170                                             |
| Methanol produced                                                                             |            |                                         | 65,377 kg                         |                                                     |
| GWP of methanol from model process = total CO <sub>2</sub> emission / total methanol produced |            |                                         | 1.67 kgCO <sub>2-eq</sub> /kgMeOH |                                                     |

### 2.2. Fischer–Tropsch process model (liquid/high-calorie-SNG fuels synthesis)

**Table S12.** Environmental assessment data from the simulation results.

|                                                                                                            | GWP factor | Unit                                    | Used amount<br>(Unit/h)               | kgCO <sub>2</sub> emitted<br>(kgCO <sub>2</sub> -eq/h) |
|------------------------------------------------------------------------------------------------------------|------------|-----------------------------------------|---------------------------------------|--------------------------------------------------------|
| CO <sub>2</sub>                                                                                            | 0.875      | kgCO <sub>2</sub> -eq/kgCO <sub>2</sub> | 95,061 kgCO <sub>2</sub>              | 83,137                                                 |
| H <sub>2</sub>                                                                                             | 0.97       | kgCO <sub>2</sub> -eq/kgH <sub>2</sub>  | 13,063 kgH <sub>2</sub>               | 12,671                                                 |
| Electricity                                                                                                | 0.492      | kgCO <sub>2</sub> -eq/kwh               | 30,836 kwh                            | 15,169                                                 |
| CO <sub>2</sub> (purged)                                                                                   | -          | -                                       | 5,351                                 | 5,351                                                  |
| Total CO <sub>2</sub> emission                                                                             |            |                                         |                                       | 116,328                                                |
| Synthetic fuel produced                                                                                    |            |                                         | 29,419 kg                             |                                                        |
| GWP of Fischer–Tropsch from model process = total CO <sub>2</sub> emission / total synthetic fuel produced |            |                                         | 3.95 kgCO <sub>2</sub> -eq/kg product |                                                        |

### 3. Appendix C. Simulation related data

#### 3.1. Methanol synthesis process model

**Table S13.** Mass flow data of main streams from methanol synthesis process simulation results.

| Stream Name     | Units | 2      | 10     | 13      | 14      | 19      | 21      | 26     | 27     | 30     | 31     |
|-----------------|-------|--------|--------|---------|---------|---------|---------|--------|--------|--------|--------|
| Temperature     | C     | 25     | 155    | 210     | 210     | 30      | 30      | 40     | 100    | 1,520  | 260    |
| Pressure        | bar   | 1      | 80     | 80      | 80      | 75      | 75      | 1      | 1      | 1      | 1      |
| Mass Flows      | kg/h  | 95,061 | 13,063 | 403,782 | 403,782 | 295,658 | 297,144 | 65,377 | 36,751 | 46,645 | 46,645 |
| CO <sub>2</sub> | kg/h  | 95,061 | 0      | 279,905 | 190,071 | 184,844 | 185,773 | 642    | 0      | 4,151  | 4,151  |
| H <sub>2</sub>  | kg/h  | 0      | 13,063 | 118,245 | 105,901 | 105,182 | 105,711 | 0      | 0      | 0      | 0      |
| CO              | kg/h  | 0      | 0      | 980     | 987     | 980     | 985     | 0      | 0      | 0      | 0      |
| Methanol        | kg/h  | 0      | 0      | 4,192   | 69,590  | 4,192   | 4,214   | 64,725 | 18     | 0      | 0      |
| Water           | kg/h  | 0      | 0      | 460     | 37234   | 460     | 463     | 10     | 36,732 | 6,786  | 6,786  |
| N <sub>2</sub>  | kg/h  | 0      | 0      | 0       | 0       | 0       | 0       | 0      | 0      | 32,114 | 32,114 |
| O <sub>2</sub>  | kg/h  | 0      | 0      | 0       | 0       | 0       | 0       | 0      | 0      | 3,595  | 3,595  |

#### 3.1. Fischer–Tropsch process model (liquid/high-calorie-SNG fuels synthesis)

**Table S14.** Mass flow data of main streams from the Fischer–Tropsch process simulation results.

| Stream Name                     | Units | 1      | 2      | 11      | 12      | 13      | 14     | 15    | 16     | 17      | 18      | 19     | 20     |
|---------------------------------|-------|--------|--------|---------|---------|---------|--------|-------|--------|---------|---------|--------|--------|
| Temperature                     | C     | 25     | 25     | 320     | 320     | 30      | 25     | 20    | 20     | 34      | 34      | 34     | 34     |
| Pressure                        | bar   | 1      | 30     | 30      | 30      | 9       | 1      | 1     | 1      | 9       | 9       | 9      | 9      |
| Mass Flows                      | kg/h  | 95,061 | 13,063 | 283,576 | 283,576 | 283,576 | 82,743 | 9,389 | 73,354 | 200,833 | 168,151 | 32,682 | 20,030 |
| CO <sub>2</sub>                 | kg/h  | 95,061 | 0      | 237,831 | 148,121 | 148,121 | 0      | 0     | 0      | 148,121 | 148,121 | 0      | 0      |
| H <sub>2</sub>                  | kg/h  | 0      | 13,063 | 45,745  | 32,682  | 32,682  | 0      | 0     | 0      | 32,682  | 0       | 32,682 | 0      |
| CH <sub>4</sub>                 | kg/h  | 0      | 0      | 0       | 3,988   | 3,988   | 0      | 0     | 0      | 3,988   | 3,988   | 0      | 3,988  |
| CO                              | kg/h  | 0      | 0      | 0       | 0       | 0       | 0      | 0     | 0      | 0       | 0       | 0      | 0      |
| C <sub>3</sub> H <sub>8</sub>   | kg/h  | 0      | 0      | 0       | 2,216   | 2,216   | 0      | 0     | 0      | 2,216   | 2,216   | 0      | 2,216  |
| C <sub>3</sub> H <sub>6</sub>   | kg/h  | 0      | 0      | 0       | 13,743  | 13,743  | 0      | 0     | 0      | 13,742  | 13,743  | 0      | 13,742 |
| H <sub>2</sub> O                | kg/h  | 0      | 0      | 0       | 73,445  | 73,445  | 73,372 | 18    | 73,354 | 73      | 73      | 0      | 73     |
| C <sub>10</sub> H <sub>22</sub> | kg/h  | 0      | 0      | 0       | 9,381   | 9,381   | 9,371  | 9,371 | 0      | 9       | 9       | 0      | 9      |

Representative reactions selected in the Fischer–Tropsch synthesis reactor model based on the experimental data given in [7].

1. Olefins (C<sub>2</sub>–C<sub>4</sub>) yield  
 $3\text{CO}_2 + 9\text{H}_2 \rightleftharpoons \text{C}_3\text{H}_6 + 6\text{H}_2\text{O}$
2. Lower paraffin's (C<sub>1</sub>–C<sub>4</sub>)  
 $3\text{CO}_2 + 10\text{H}_2 \rightleftharpoons \text{C}_3\text{H}_6 + 6\text{H}_2\text{O}$
3. Higher paraffin's (C<sub>5</sub>+)  
 $3\text{CO}_2 + 10\text{H}_2 \rightleftharpoons \text{C}_3\text{H}_6 + 6\text{H}_2\text{O}$
4. Methane:  
 $\text{CO}_2 + 4\text{H}_2 \rightleftharpoons \text{CH}_4 + 6\text{H}_2\text{O}$

## References

- [1] S. Alsayegh, J. R. Johnson, B. Ohs, and M. Wessling, “Methanol production via direct carbon dioxide hydrogenation using hydrogen from photocatalytic water splitting: Process development and techno-economic analysis,” *J. Clean. Prod.*, vol. 208, pp. 1446–1458, 2019, doi: 10.1016/j.jclepro.2018.10.132.
- [2] F. G. Albrecht, D. H. König, N. Baucks, and R. U. Dietrich, “A standardized methodology for the techno-economic evaluation of alternative fuels – A case study,” *Fuel*, vol. 194, pp. 511–526, 2017, doi: 10.1016/j.fuel.2016.12.003.
- [3] M. S. Peters, K. D. Timmerhaus, and R. E. West, *Plant Design and Economics for Chemical Engineers*, vol. 35. McGraw-Hill Companies, Inc., 1221 Avenue of the Americas, New York, NY 10020, 2003.
- [4] L. Tock, M. Gassner, and F. Maréchal, “Thermochemical production of liquid fuels from biomass: Thermo-economic modeling, process design and process integration analysis,” *Biomass and Bioenergy*, vol. 34, no. 12, pp. 1838–1854, 2010, doi: 10.1016/j.biombioe.2010.07.018.
- [5] A. Mivechian and M. Pakizeh, “Hydrogen recovery from Tehran refinery off-gas using pressure swing adsorption, gas absorption and membrane separation technologies: Simulation and economic evaluation,” *Korean J. Chem. Eng.*, vol. 30, no. 4, pp. 937–948, 2013, doi: 10.1007/s11814-012-0221-y.
- [6] T. N. Do and J. Kim, “Green C2-C4 hydrocarbon production through direct CO<sub>2</sub> hydrogenation with renewable hydrogen: Process development and techno-economic analysis,” *Energy Convers. Manag.*, vol. 214, no. May, p. 112866, 2020, doi: 10.1016/j.enconman.2020.112866.
- [7] T. Numpilai *et al.*, “Structure–activity relationships of Fe-Co/K-Al<sub>2</sub>O<sub>3</sub> catalysts calcined at different temperatures for CO<sub>2</sub> hydrogenation to light olefins,” *Appl. Catal. A Gen.*, vol. 547, no. May, pp. 219–229, 2017, doi: 10.1016/j.apcata.2017.09.006.
